# Supplementary material for: A 225-Year (1799–2024) Homogenized Daily Water Level Series of the Vistula River in Warsaw
Source: Copernicus journal article supplement (doi:10.5194/essd-2025-538), 2025-12-04
Supplement: Supplementary file [file essd-2025-538-AC2-supplement.pdf]

**Selected modelling results for historical extreme water levels and discharges of the Vistula River in Warsaw before 1951**

| Date       | Vistula water level reconstructed in the respective study [cm] | Discharge [m <sup>3</sup> s <sup>-1</sup> ] | Source                                                                                 |
|------------|----------------------------------------------------------------|---------------------------------------------|----------------------------------------------------------------------------------------|
| 1813-08-30 | 794                                                            | 7,180                                       | Fal & Dąbrowski (2001a)                                                                |
|            |                                                                | 8,400                                       | Kuźniar (2008) – cyt. za Kuźniar & Magnuszewski (2010)                                 |
|            |                                                                | 7,430                                       | Kuźniar & Magnuszewski (2010); Magnuszewski et al. (2012)                              |
| 1844-07-27 | 850                                                            | 8,223                                       | Kuźniar (1997)                                                                         |
|            |                                                                | 8,890                                       | Fal & Dąbrowski (2001a)                                                                |
|            |                                                                | 8,250                                       | Kuźniar & Magnuszewski (2010); Magnuszewski et al. (2012); Magnuszewski & Moran (2015) |
| 1844-06-24 | 732                                                            | 5,960                                       | Wierzbicki (2001)                                                                      |
| 1924-03-27 | 738                                                            | 5,464                                       | Kuźniar (1997)                                                                         |
|            |                                                                | 5,860                                       | Bogdanowicz et al. (2000); Fal & Dąbrowski (2001b); Wierzbicki (2001)                  |
| 1925-07-06 | 653                                                            | 3,800                                       | Siebauer (1947)                                                                        |
|            |                                                                | 3,830                                       | Jankowski & Stolarska (1978)                                                           |
| 1931-09-30 | 672                                                            | 4,180                                       | Jankowski & Stolarska (1978)                                                           |
| 1934-07-23 | 725                                                            | 5,570                                       | Siebauer (1947)                                                                        |
|            |                                                                | 5,550                                       | Jankowski & Stolarska (1978)                                                           |
|            |                                                                | 5,348                                       | Kuźniar (1997)                                                                         |
|            |                                                                | 5,460                                       | Magnuszewski et al. (2012)                                                             |
| 1948-06-12 | 727                                                            | 4,580                                       | Jankowski & Stolarska (1978)                                                           |
